# Supplementary material for: Carnitine palmitoyltransferase 1A promotes mitochondrial fission by enhancing MFF succinylation in ovarian cancer
Source: Springer Nature journal article supplement (doi:10.1038/s42003-023-04993-x), 2023-06-08
Supplement: MOESM1 [file 42003_2023_4993_MOESM1_ESM.pdf]

Supplementary Fig. 1

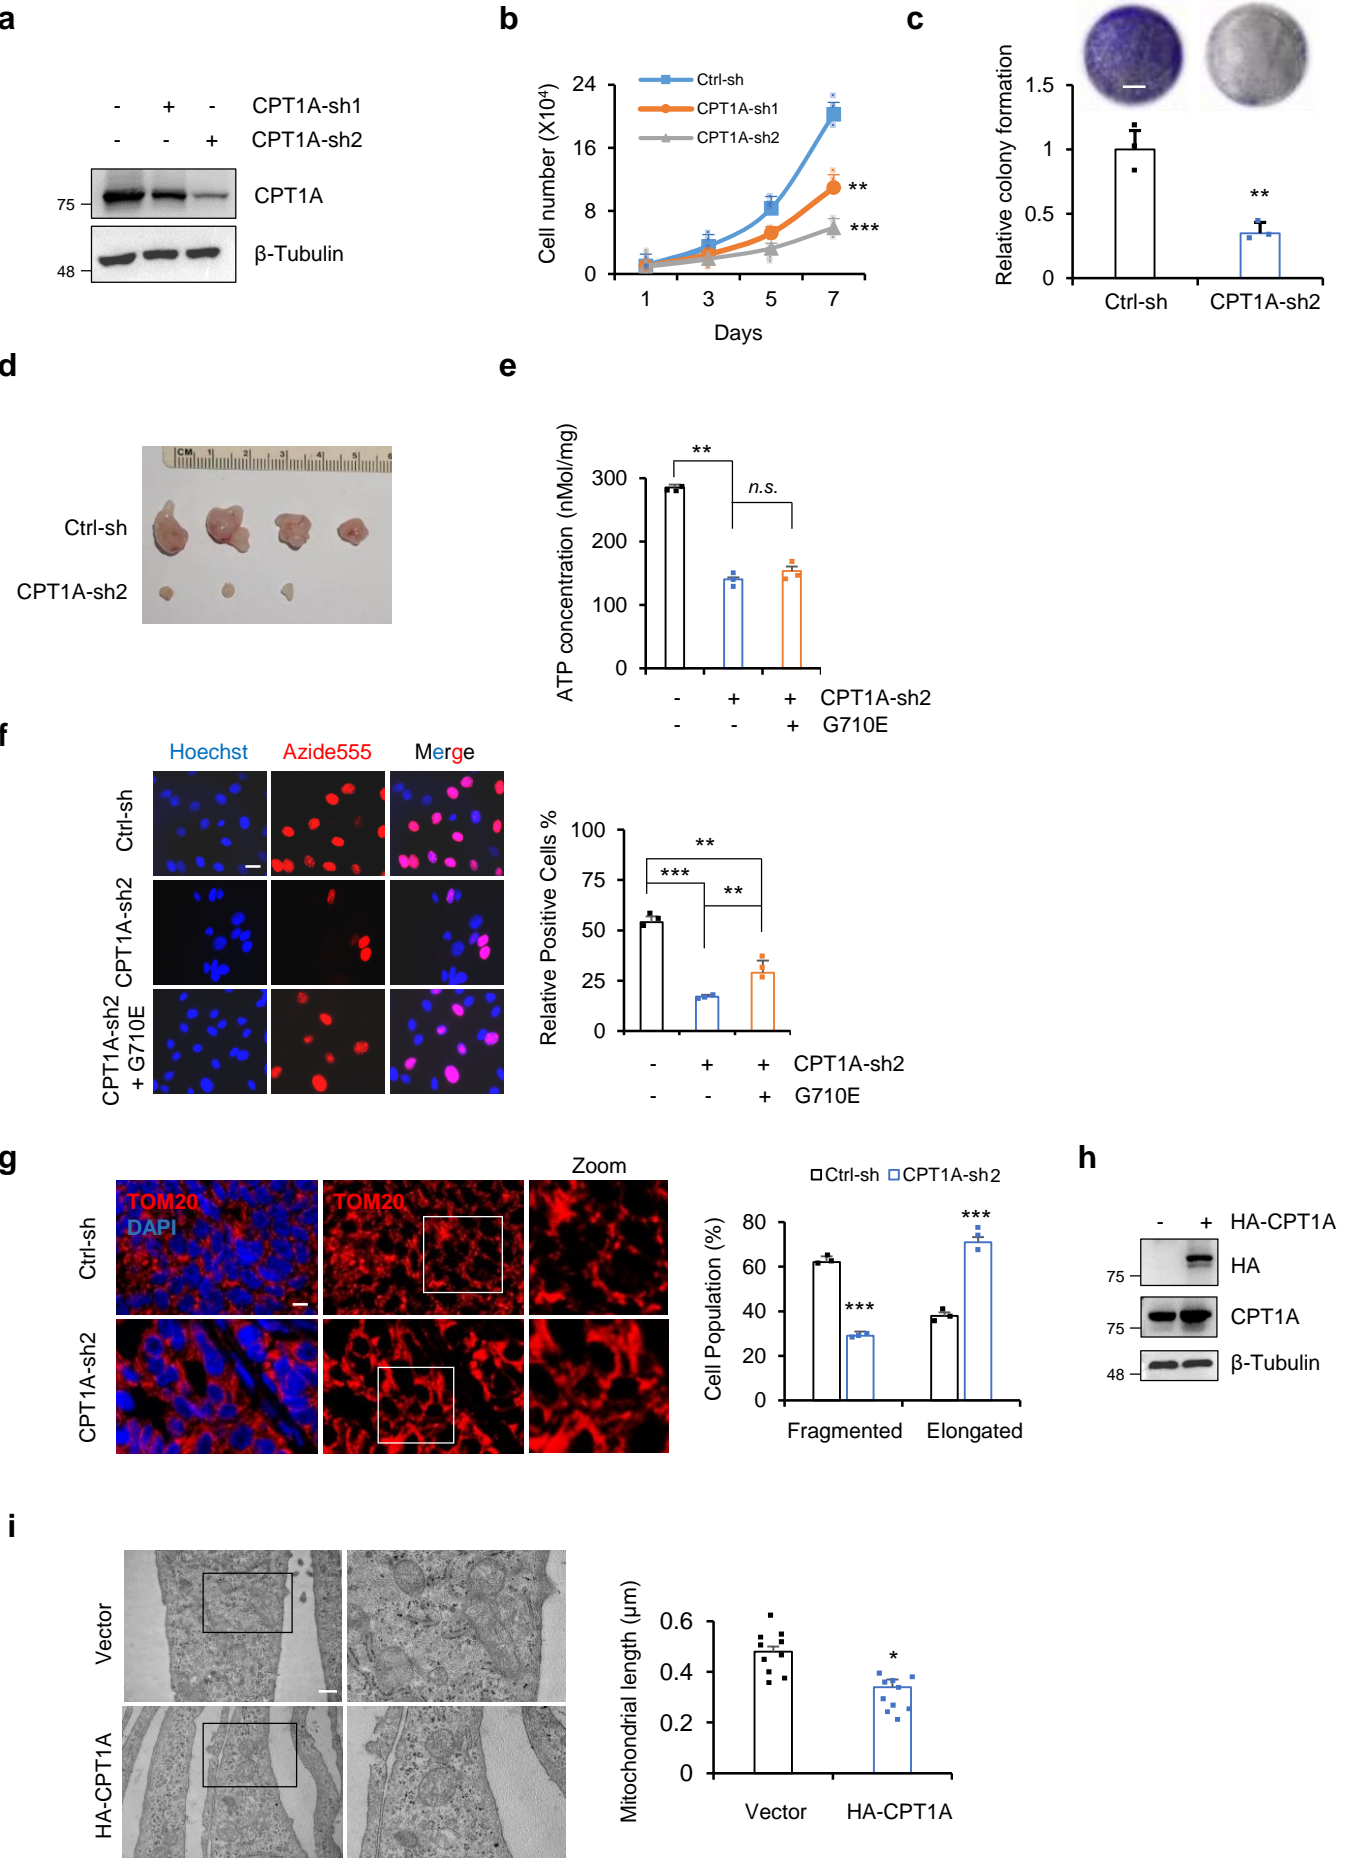

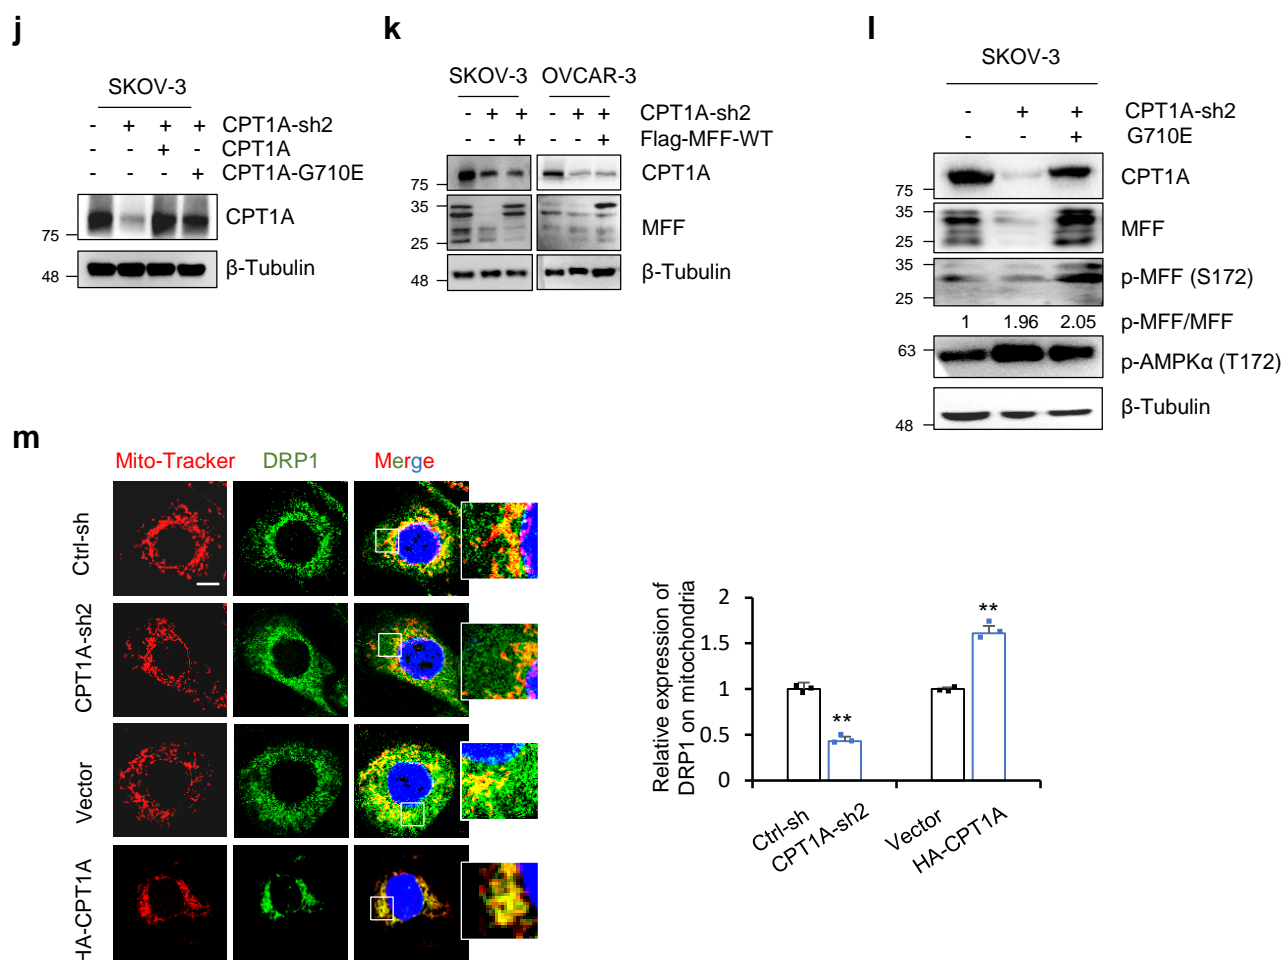

## Supplementary Fig. 1. CPT1A knockdown significantly inhibited the growth of ovarian cancer cells.

**a** CPT1A was knocked down by shRNA in SKOV-3 cells. The CPT1A expression was examined by western blotting. **b** Growth curves of SKOV-3 cells with control or CPT1A knockdown, seeded in 24-well plates, were constructed from counting for up to 7 days,  $n=3$  for each group. **c** Colony formation assay was performed in SKOV-3 cells with control and CPT1A knockdown. Microphotographs covering representative areas of each treatment were shown (upper). Numbers of colonies in each well of six-well plates were analyzed ( $n=3$  for each group, lower). Scale bar = 10 mm. **d** SKOV-3 cells ( $5 \times 10^6$ ) with control or CPT1A knockdown were injected subcutaneously on the right flank of nude mice. Xenograft tumors were harvested 3 weeks after inoculation ( $n=4$  nude mice). **e** ATP concentration was detected in SKOV-3 cells with control, CPT1A knockdown and CPT1A-G710E (G710E) overexpression in conjunction with CPT1A knockdown,  $n=3$  for each group. **f** The EdU proliferation assay was performed in SKOV-3 cells with control, CPT1A knockdown or exogenous overexpression of G710E in conjunction with CPT1A knockdown. Representative image (left) and the ratio of EdU-positive cells ( $n=3$  for each group, right) are shown. Scale bar = 25  $\mu\text{m}$ . **g** Immunofluorescent staining of TOM20 in xenograft tumor cells revealed that CPT1A knockdown promotes mitochondrial fusion *in vivo* (left, scale bar=10  $\mu\text{m}$ ). The proportion of cells ( $n=3$  samples, each sample contains 100 cells) with fragmented, or elongated mitochondria was quantified (right). **h** Western blotting analysis of HA-tagged CPT1A exogenous overexpression in SKOV-3 cells. **i** Representative images showing mitochondrial morphology in SKOV-3 cells with empty vector or HA-CPT1A by transmission electron microscopy (left, scale bars=500 nm). Quantification of mitochondrial morphology in electron microscope images ( $n=10$  for each group, right).

**j** Western blotting analysis of CPT1A in SKOV-3 cells with Ctrl-sh, CPT1A knockdown, exogenously overexpressed CPT1A-WT + CPT1A-sh and CPT1A-G701E + CPT1A-sh. **k** Western blotting analysis of CPT1A and MFF in SKOV-3 and OVCAR-3 cells with exogenously overexpressed MFF in conjunction with CPT1A knockdown. **l** MFF, p-MFF (S172) and p-AMPK $\alpha$  (T172) were analyzed by western blotting in SKOV-3 cells with control, CPT1A knockdown and G710E overexpression in conjunction with CPT1A knockdown. The relative p-MFF expression was normalized to MFF and then compared to control groups. **m** Detection of DRP1 (green), MitoTracker (red) by immunofluorescence in SKOV-3 cells. Representative images are shown (left). The relative colocalization of DRP1 with mitochondria was quantified by using imageJ (right, n=3 for each group). scale bar=10  $\mu$ m. Data represent the mean  $\pm$  SD; \*p < 0.05, \*\*p < 0.01 and \*\*\*p < 0.001, *n.s.* indicates no significant difference compared with the control groups.

Supplementary Fig. 2

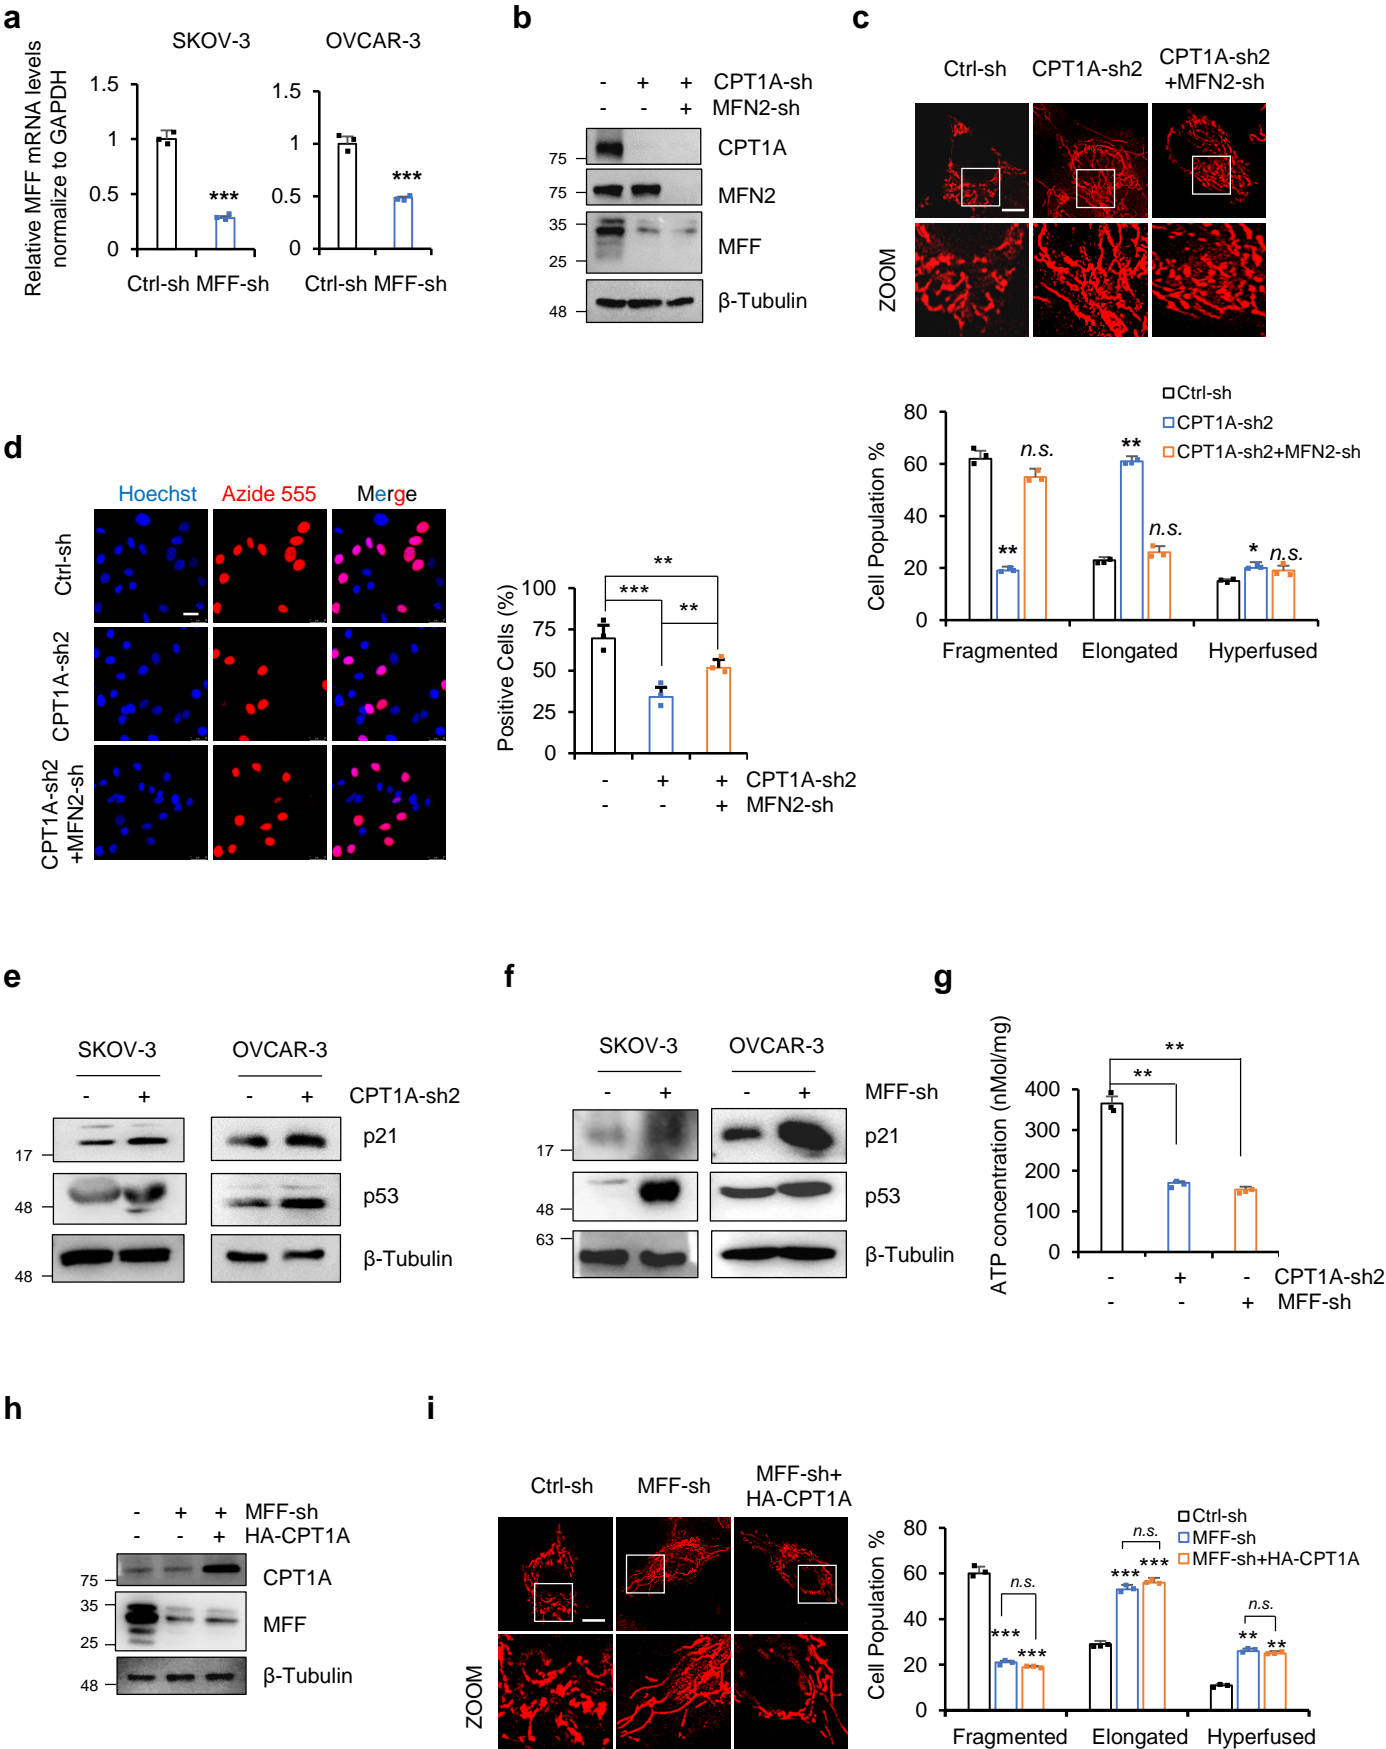

**j**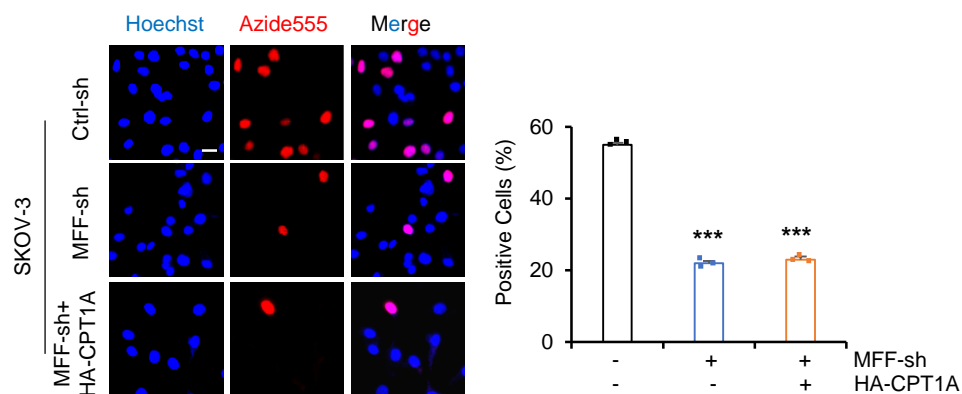**k**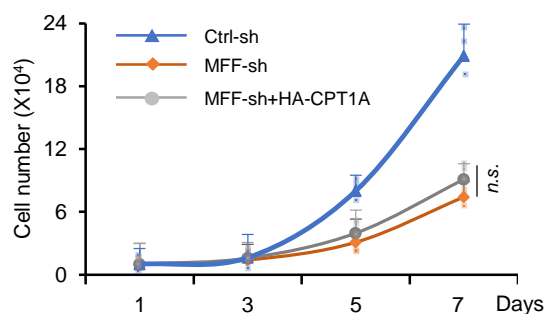**l**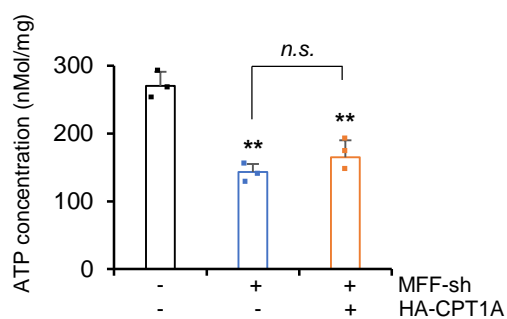**m**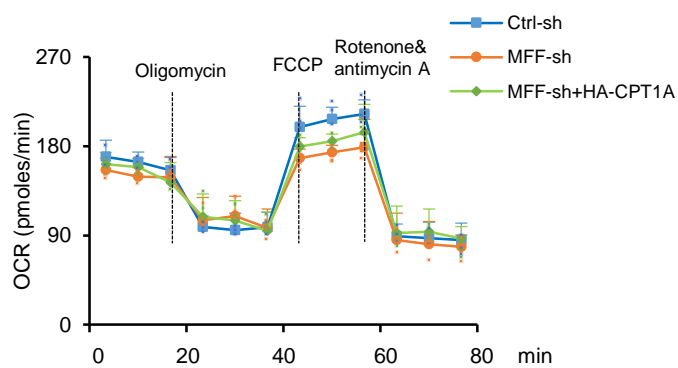**n**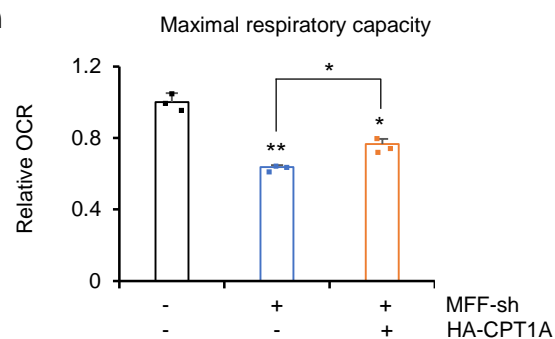**o**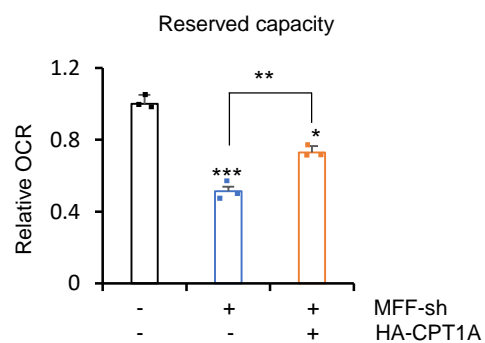

## **Supplementary Fig. 2. Mitochondrial dynamics affect the proliferation of ovarian cancer cells.**

**a** The knockdown efficiency of MFF was examined in SKOV-3 and OVCAR-3 cells by real-time PCR,  $n=3$  for each group. **b** Western blotting analysis of CPT1A, MFF and MFN2 in SKOV-3 cells with control, CPT1A knockdown and MFN2 knockdown in conjunction with CPT1A-sh. **c** Representative mitochondrial morphologies of SKOV-3 cells with control, CPT1A knockdown or CPT1A and MFN2 double knockdown. (upper, scale bar=10  $\mu\text{m}$ ). The proportion of cells with different mitochondrial morphologies was quantified ( $n=3$  samples, each sample contains 100 cells, lower). **d** Cell proliferation assay was performed by EdU assay in SKOV-3 cell with control, CPT1A knockdown or CPT1A and MFN2 double knockdown,  $n=3$  for each group, scale bar = 25  $\mu\text{m}$ . **e** Induction of p21 and p53 by CPT1A knockdown was confirmed by immunoblotting. **f** Induction of p21 and p53 by MFF knockdown was confirmed by immunoblotting. **g** ATP concentration was analyzed in SKOV-3 cells with control, CPT1A knockdown and MFF knockdown,  $n=3$  for each group. **h** CPT1A and MFF were examined by western blotting analysis in SKOV-3 cells with control, MFF knockdown and exogenous overexpression of HA-CPT1A in conjunction with MFF knockdown. **i** Representative images of the mitochondrial morphology in SKOV-3 cells with control, MFF knockdown or exogenous overexpression of CPT1A-WT in conjunction with MFF knockdown (left, scale bar=10  $\mu\text{m}$ ). The proportion of cells ( $n=3$  samples, each sample contains 100 cells) with fragmented, elongated and hyperfused mitochondria was quantified (right). **j** Cell proliferation assay was performed by EdU assay in SKOV-3 cell with control, MFF knockdown or exogenous overexpression of HA-CPT1A in conjunction with MFF knockdown,  $n=3$  for each group. Scale bar = 25  $\mu\text{m}$ . **k** Growth curves of SKOV-3 cells with ctrl-sh, MFF-sh and MFF-sh + HA-CPT1A, plated in 24-well plates, were constructed from quantification of cell numbers for up to 7 days,  $n=3$  for each group. **l** ATP concentration was assessed in SKOV-3 cells with control, MFF knockdown and exogenous overexpression of HA-CPT1A in conjunction with MFF knockdown,  $n=3$  for each group. **m** The oxygen consumption rate (OCR) assay was performed in SKOV-3 cells with control, MFF knockdown and exogenous overexpression of HA-CPT1A in conjunction with MFF knockdown,  $n=3$  for each group. **n** The quantification ( $n=3$  for each group) of maximal respiratory capacity in **m**. **o** The quantification ( $n=3$  for each group) of reserved capacity in **m**. Data represent the mean  $\pm$  SD; \* $p < 0.05$ , \*\* $p < 0.01$  and \*\*\* $p < 0.001$ , as compared with control groups.

Supplementary Fig. 3

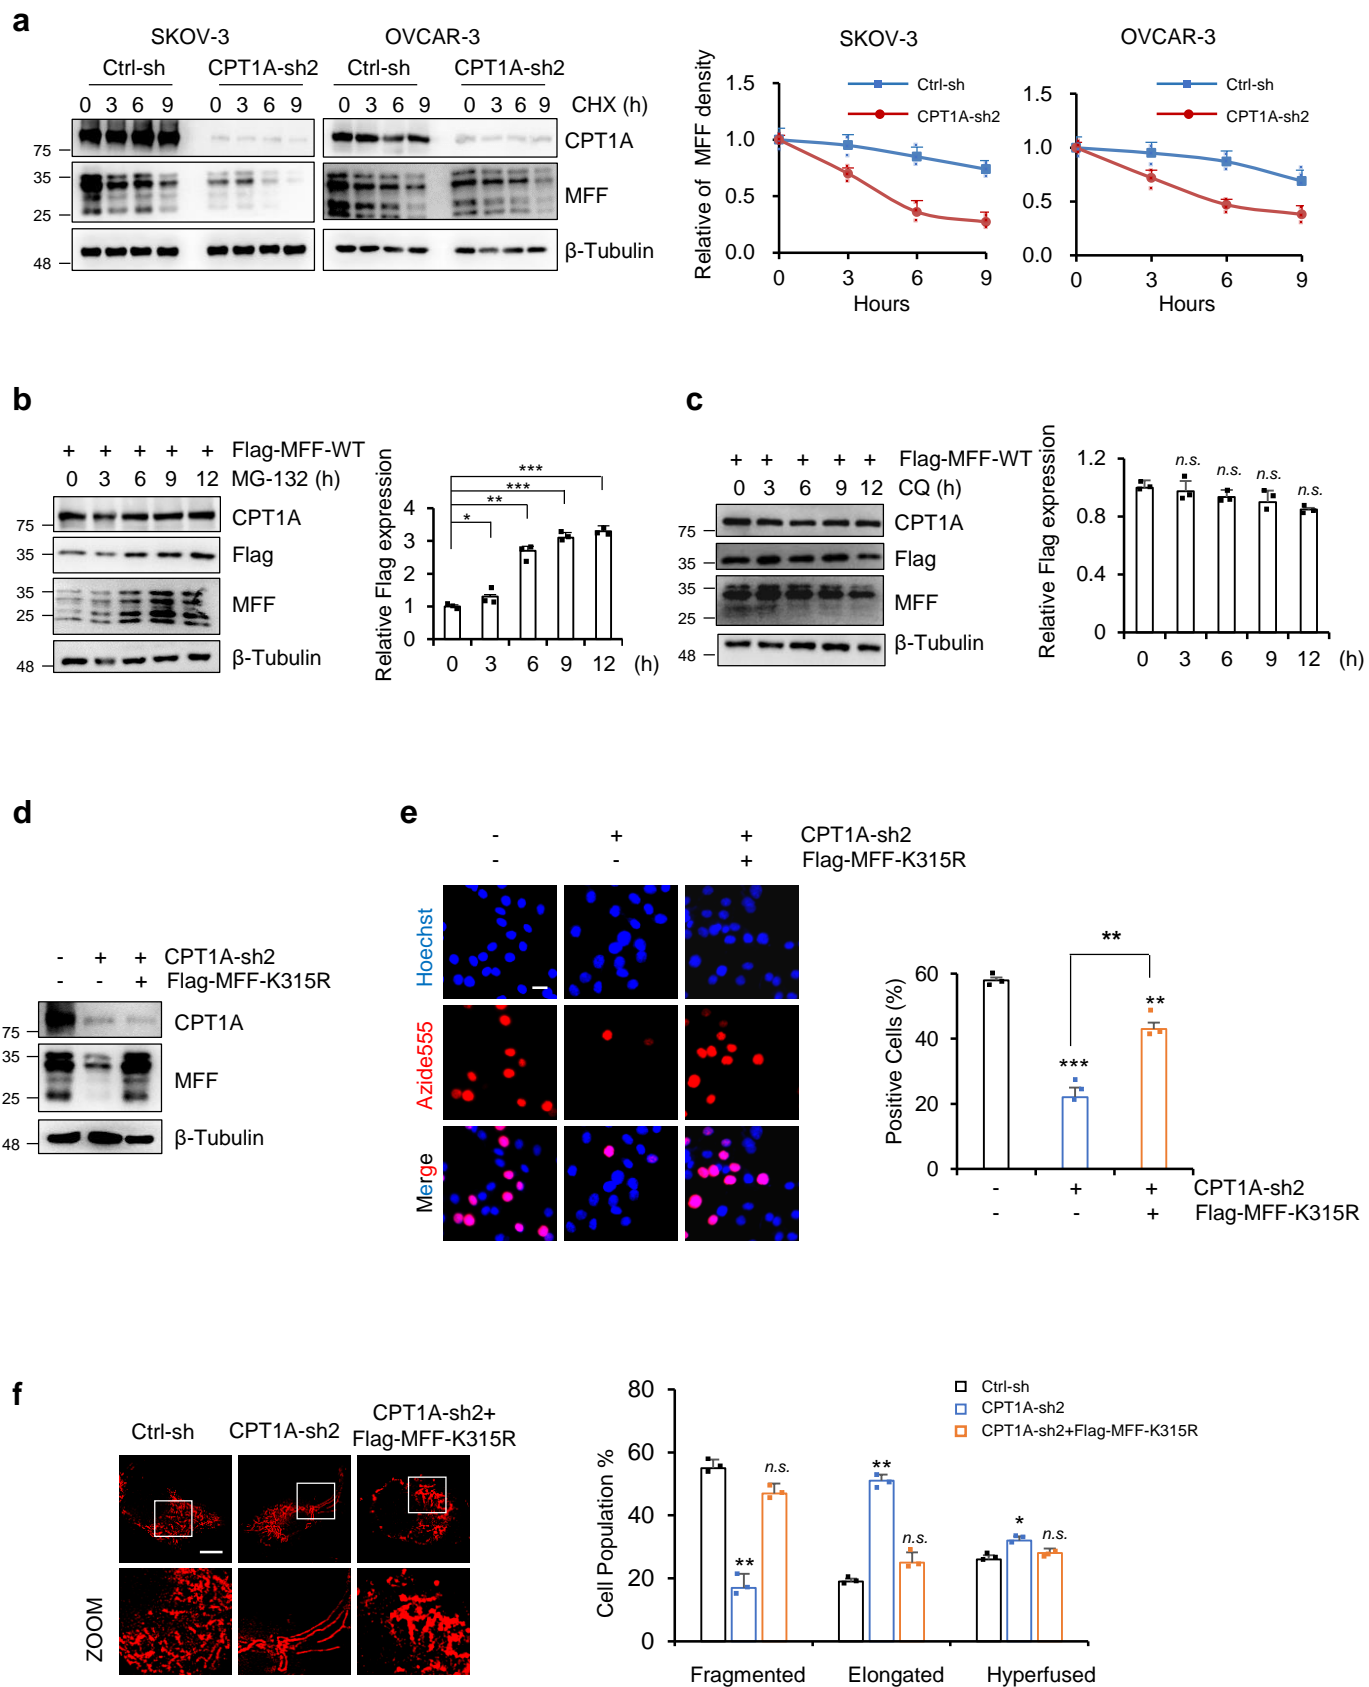

### Supplementary Fig. 3. CPT1A knockdown leads to MFF degradation.

**a** SKOV-3 and OVCAR-3 cells with or without CPT1A-sh2 were treated with 10  $\mu$ M cycloheximide (CHX) for up to 9 hours. Whole cell lysates were prepared and detected against CPT1A and MFF antibodies (left). And densitometric analysis of MFF immunoblot band was performed with ImageJ (n=3 for each group, right). **b, c** SKOV-3 (**b**) and ES2 (**c**) cells transfected with Flag-MFF-WT plasmid were treated with 10  $\mu$ M cycloheximide (CHX) for up to 12 hours. Cells were harvested at the indicated time point and the expression of CPT1A and Flag-MFF were analyzed by western blotting (left). And densitometry of Flag immunoblot was performed with ImageJ and normalized to their  $\beta$ -tubulin. The relative expression of Flag-MFF was presented (n=3 for each group, right). **d** CPT1A and MFF was examined by western blotting analysis in SKOV-3 cells with control, CPT1A knockdown and exogenous overexpression of Flag-MFF-K315R in conjunction with CPT1A knockdown. **e** Cell proliferation assay was performed by EdU assay in SKOV-3 cell with control, CPT1A knockdown or exogenous overexpression of Flag-MFF-K315R in conjunction with CPT1A knockdown, n=3 for each group. Scale bar=25  $\mu$ m. **f** Representative images of the mitochondrial morphology in SKOV-3 cells with control, CPT1A knockdown and exogenous overexpression of Flag-MFF-K315R in conjunction with CPT1A knockdown (left, scale bar=10  $\mu$ m). The proportion of cells (n=3 samples, each sample contains 100 cells) with fragmented, elongated, and hyperfused mitochondria was quantified (right). Data represent the mean  $\pm$  SD; \*p < 0.05, \*\*p < 0.01 and \*\*\*p < 0.001, n.s. indicates no significant difference compared with the control groups.



Supplementary Fig. 4

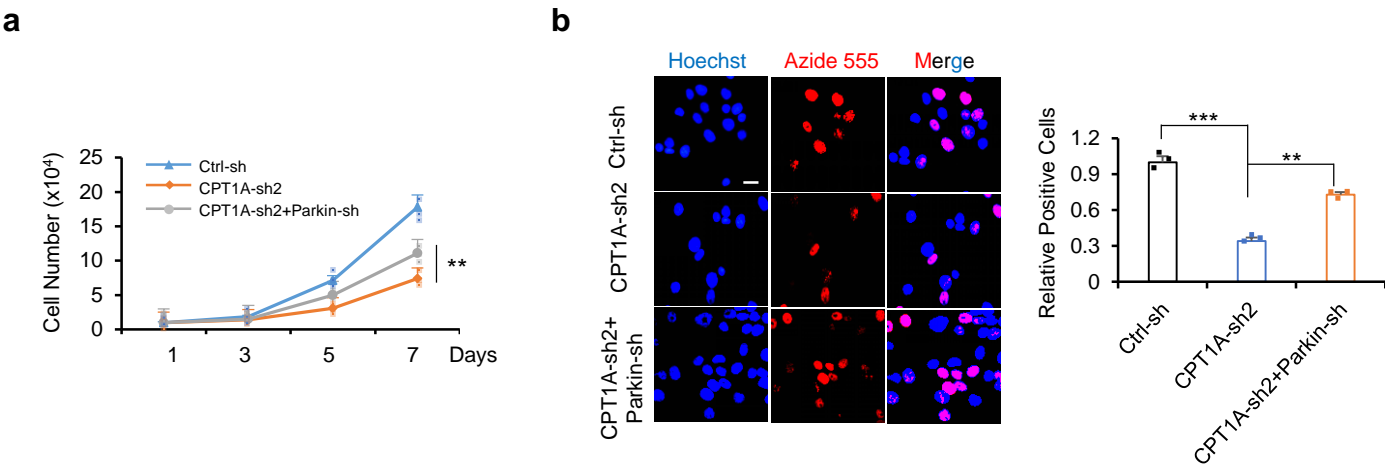

**Supplementary Fig. 4. Parkin affects the proliferation of ovarian cancer cells.**

**a** SKOV-3 cells with control, CPT1A knockdown, or CPT1A and Parkin double knockdown were seeded in 24-well plates. Growth curves were constructed from quantification of cell numbers for up to 7 days, n=3 for each group. **b** The EdU proliferation assay was performed in SKOV-3 cells with control, CPT1A knockdown, or CPT1A and Parkin double knockdown. Representative image (left) and the ratio of EdU positive cells (n=3 for each group, right) are shown. Scale bars=25  $\mu$ m. Data represent the mean  $\pm$  SD; \*p < 0.05, \*\*p < 0.01 and \*\*\*p < 0.001, as compared with control groups.

Supplementary Fig. 5

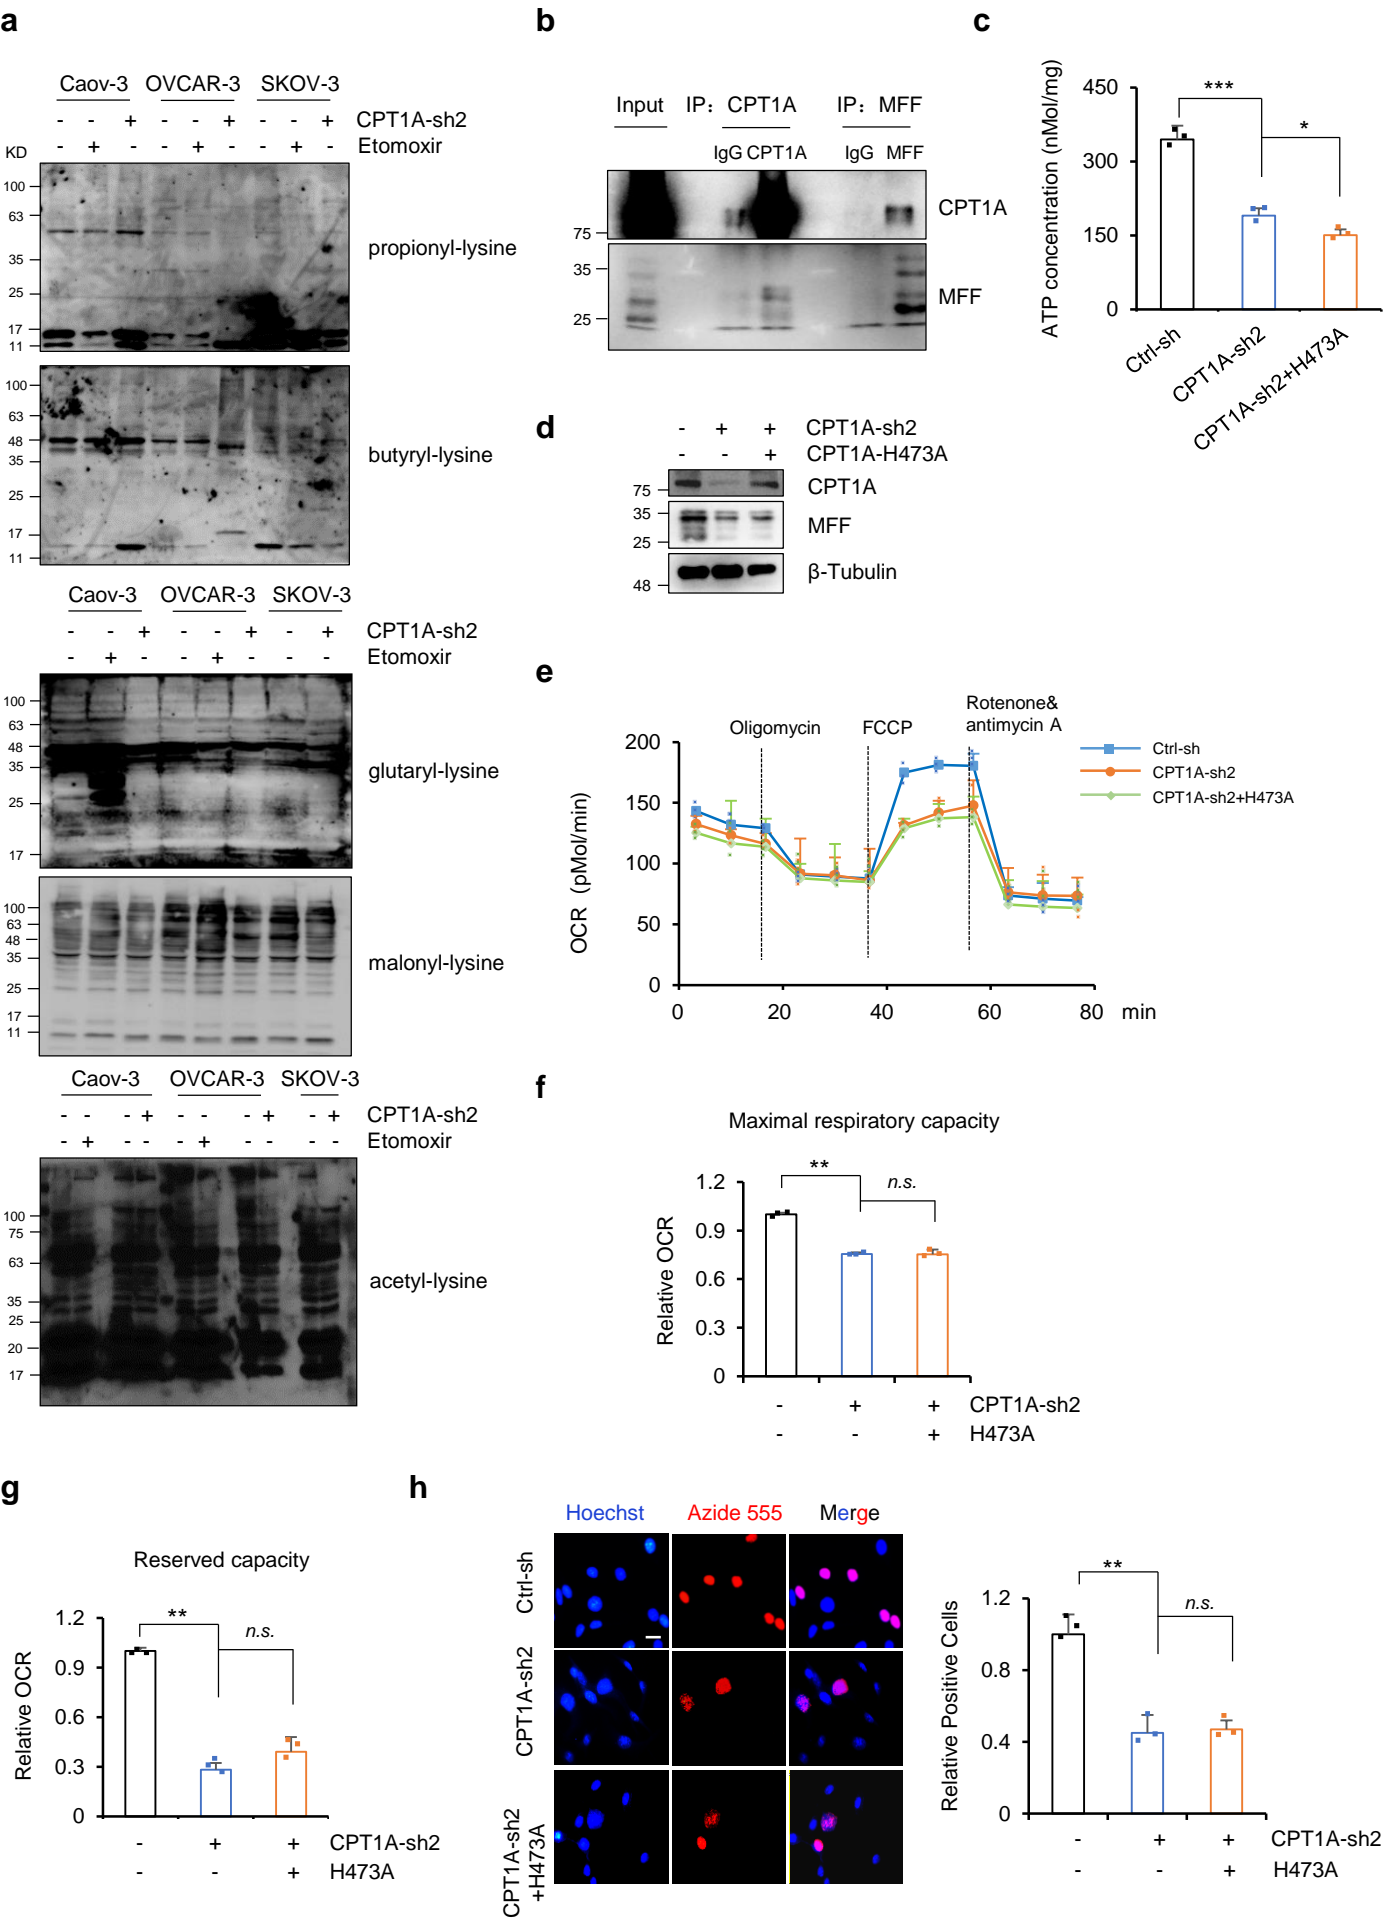

### **Supplementary Fig. 5. CPT1A promotes MFF succinylation.**

**a** CAOV-3, OVCAR-3 and SKOV-3 cells with CPT1A knockdown or cells treated with etomoxir (10  $\mu$ M) for 24 hours were harvested for acylation modifications by western blotting. Bands are derived from the different gels. **b** SKOV-3 cells were collected, co-immunoprecipitated with anti-CPT1A and anti-MFF antibodies, respectively, followed by immunoblotting with anti-MFF or anti-CPT1A antibodies. **c** ATP concentration was assessed in SKOV-3 cells with control, CPT1A knockdown, and CPT1A knockdown in conjunction with CPT1A-H473A (H473A) overexpression,  $n=3$  for each group. **d** CPT1A and MFF were examined by Western blotting in cells of (**c**). Beat-tubulin was used as a loading control. **e** The oxygen consumption rate (OCR) assay was performed in SKOV-3 cell with control, CPT1A knockdown, or CPT1A knockdown in conjunction with CPT1A-H473A exogenous overexpression,  $n=3$  for each group. **f, g** The maximal respiratory capacity (**f**) and reserved capacity (**g**) were quantified,  $n=3$  for each group. **h** The EdU proliferation assay was performed in SKOV-3 cells with control, CPT1A knockdown, or CPT1A knockdown in conjunction with CPT1A-H473A exogenous overexpression. Representative image (left) and the ratio of EdU positive cells ( $n=3$  for each group, right) are shown. Scale bars=25  $\mu$ m. Data represent the mean  $\pm$  SD; \* $p < 0.05$ , \*\* $p < 0.01$  and \*\*\* $p < 0.001$ , *n.s.* indicates no significant difference compared with the CPT1A-sh groups.

Supplementary Fig. 6

Fig. 1e

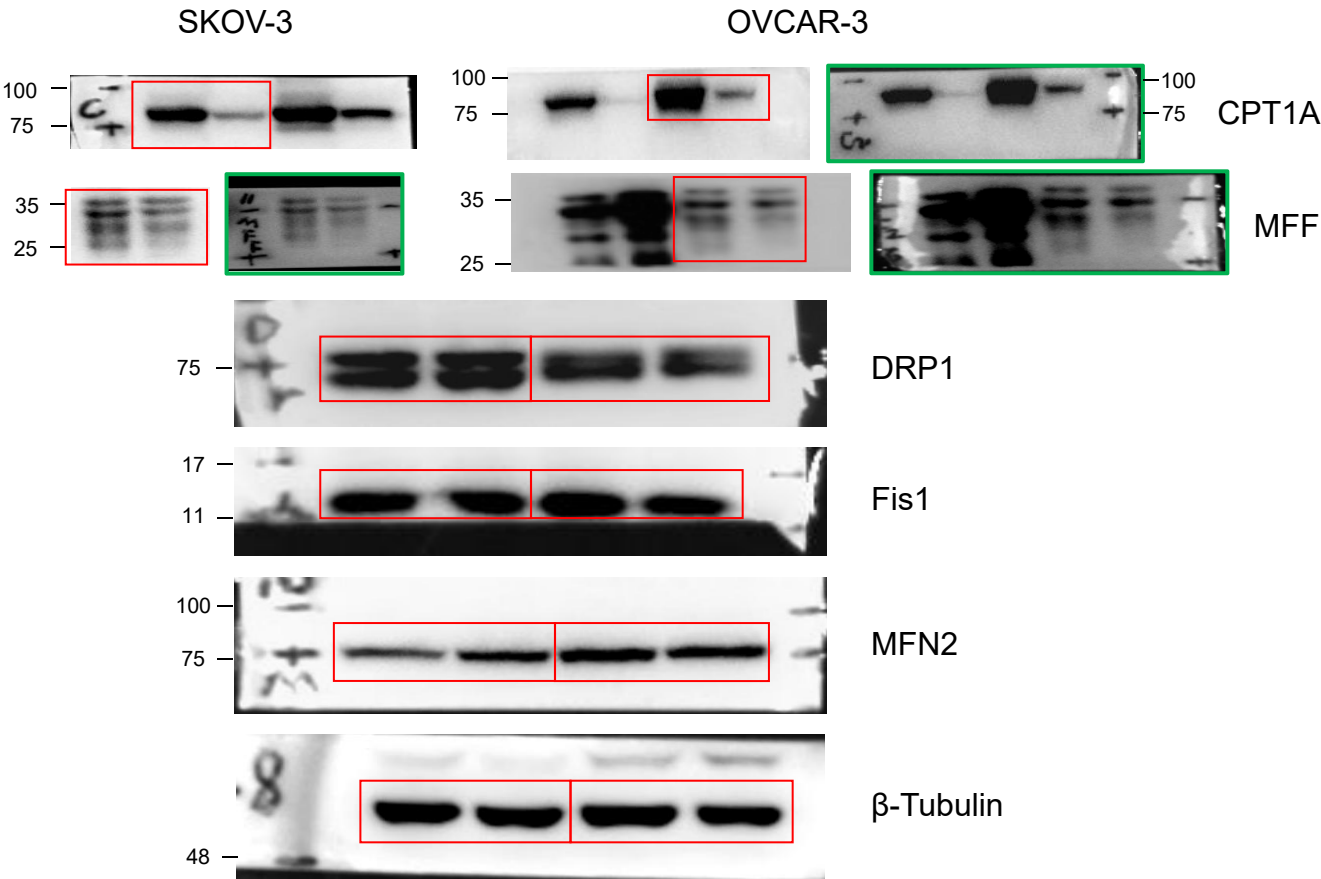

Fig. 1f

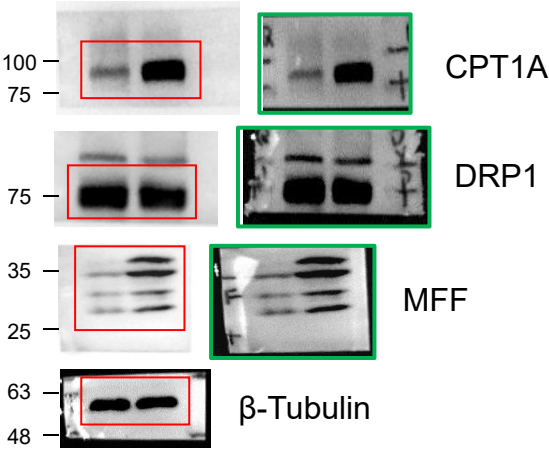

Fig. 2a

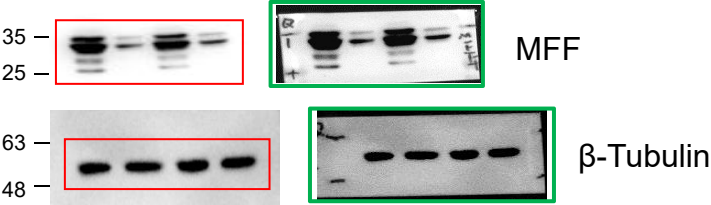

Fig. 3a

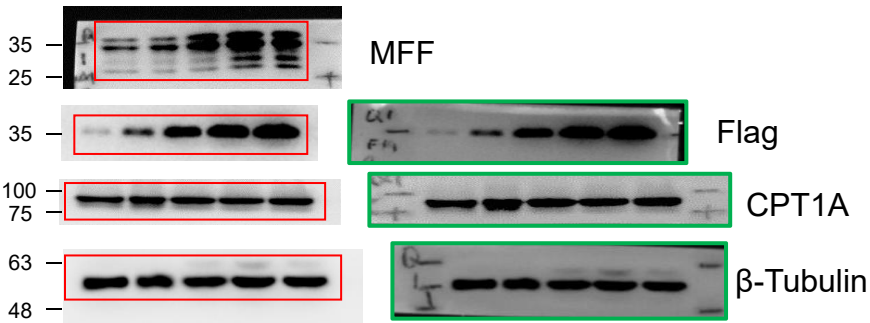

Fig. 3b

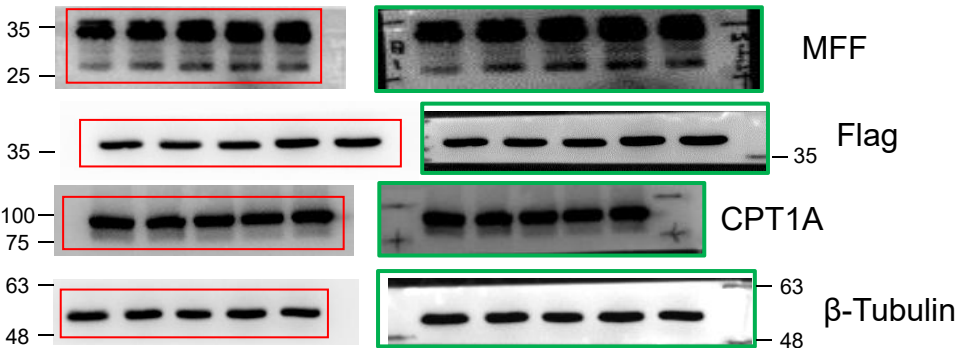

Fig. 3c

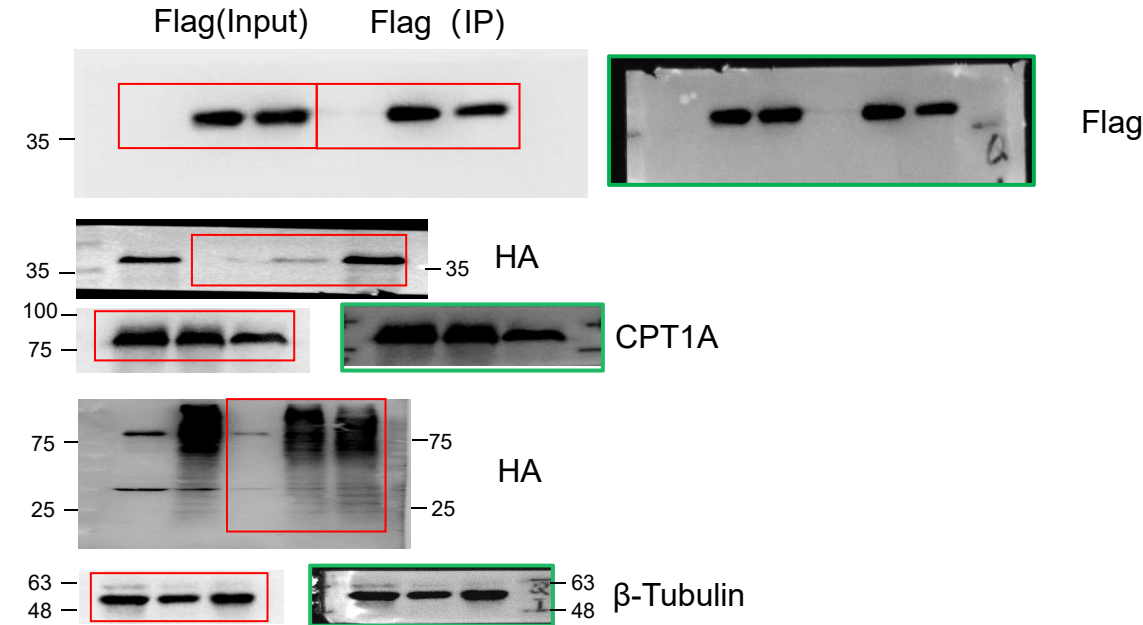

Fig. 3d

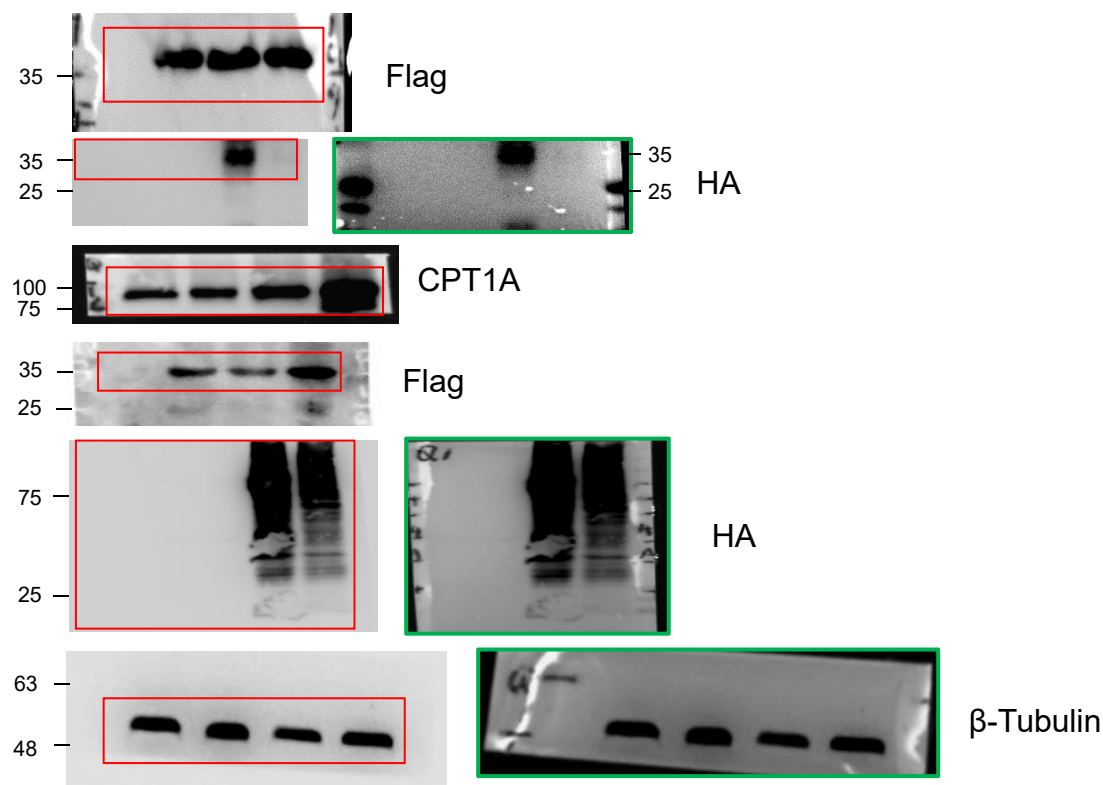

Fig. 3g

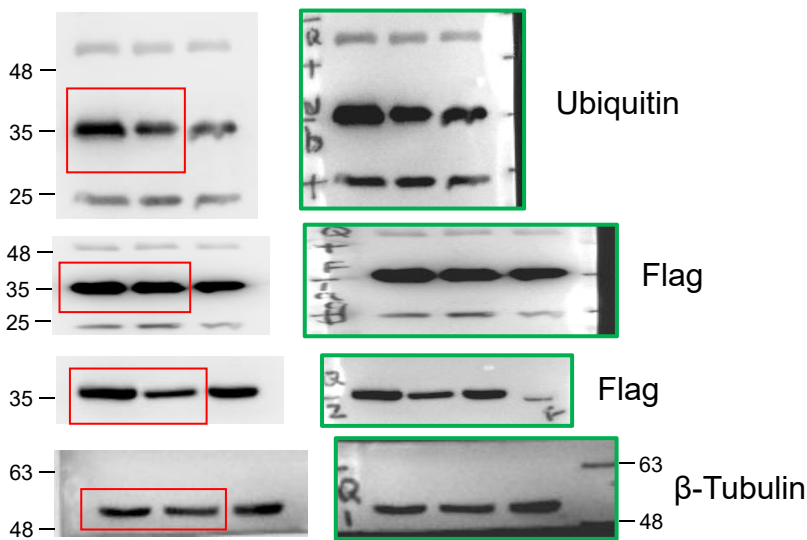

Fig. 3h

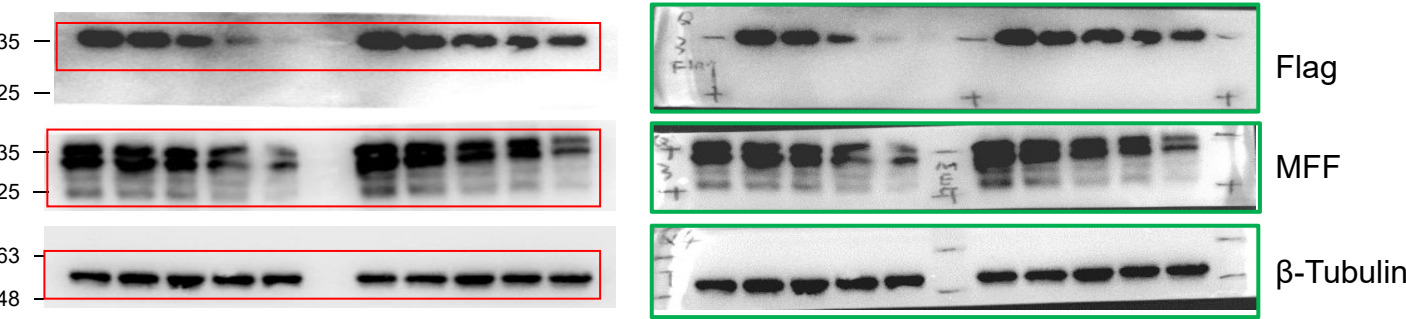

Fig. 4b

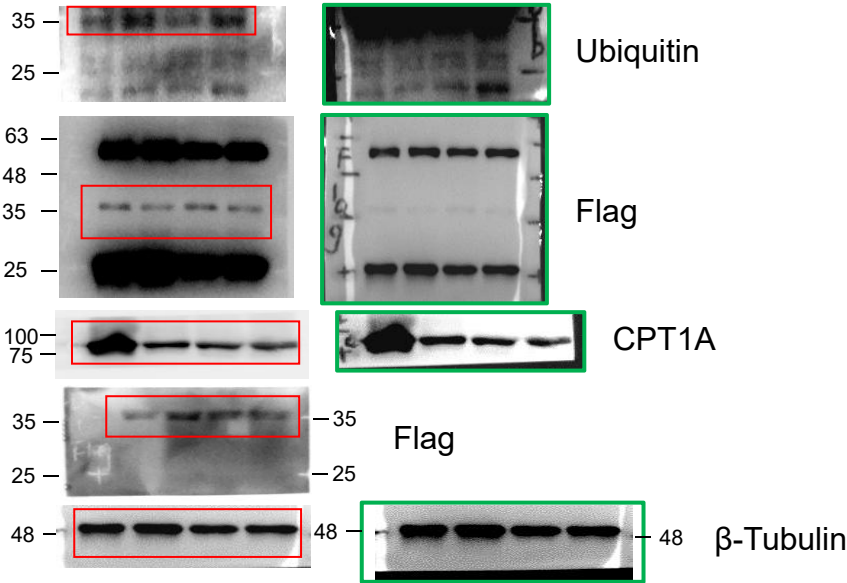

Fig. 4c

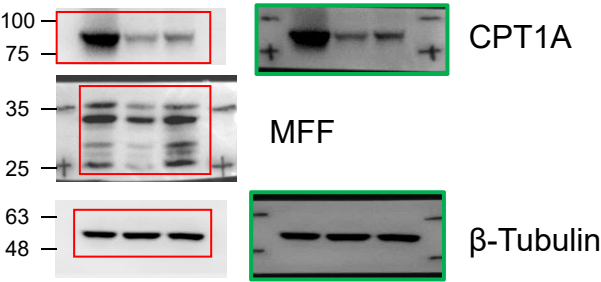

**Fig. 4d**

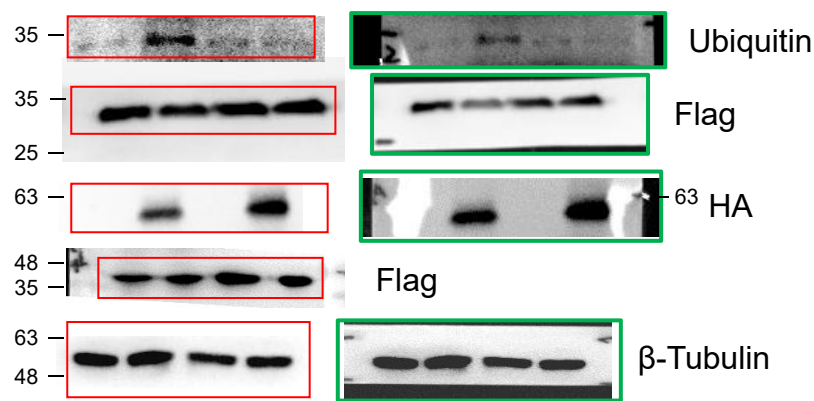

**Fig. 4e**

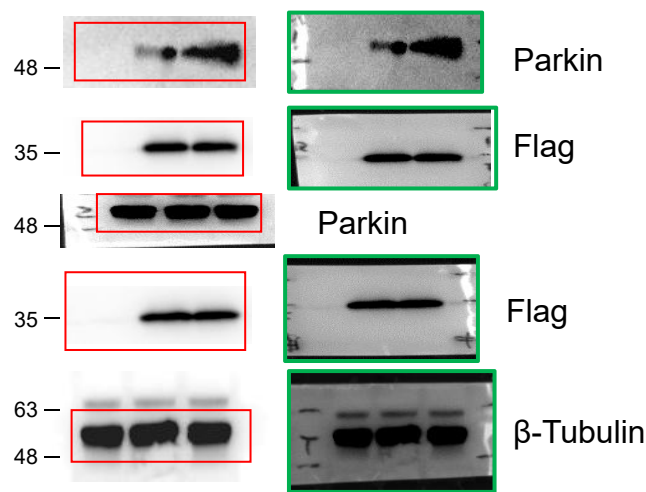

**Fig. 4f**

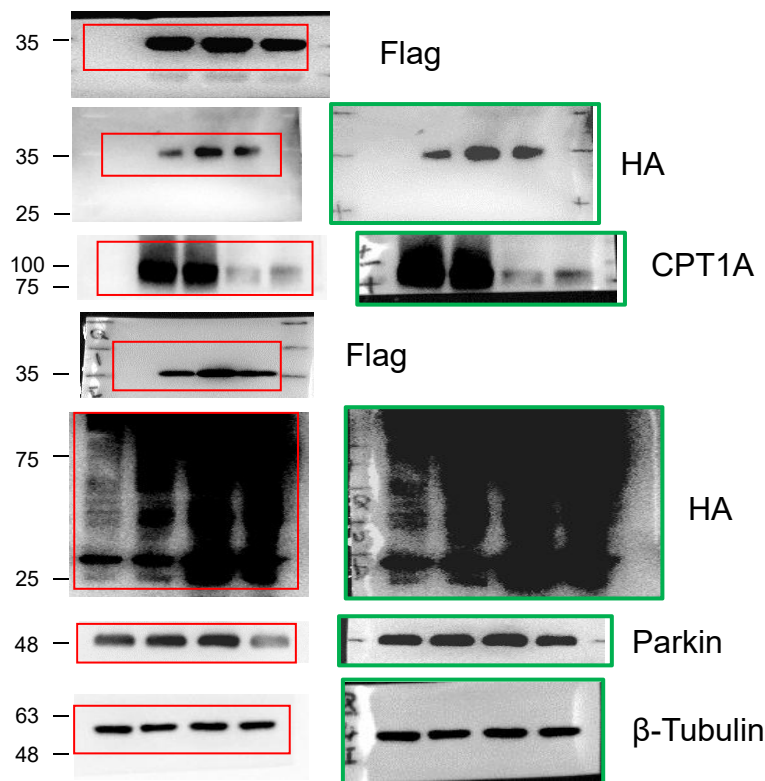



**Fig. 5a**

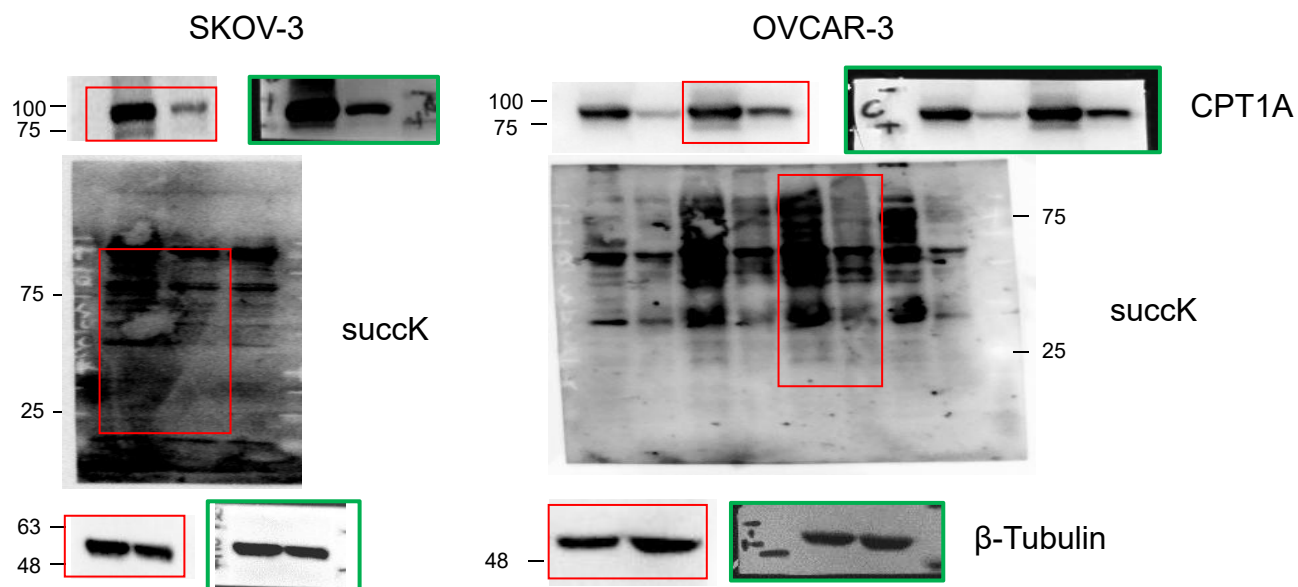

**Fig. 5b**

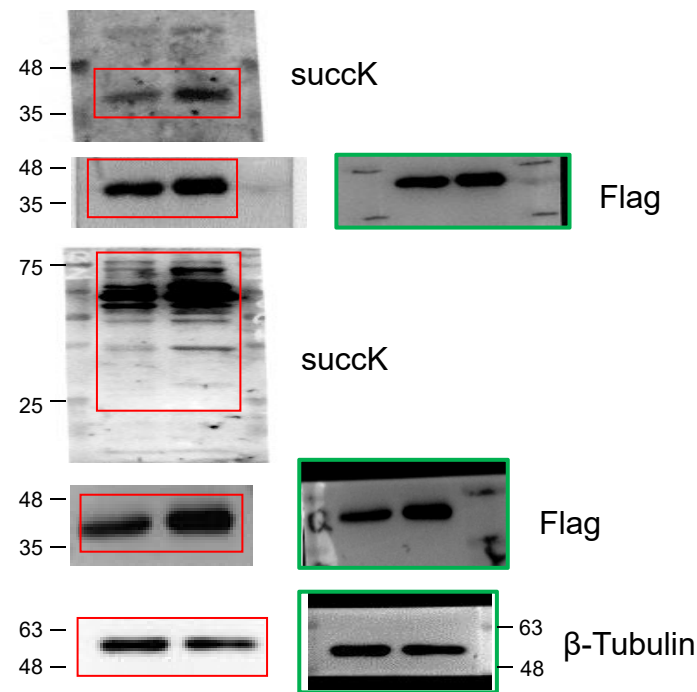

**Fig. 5c**

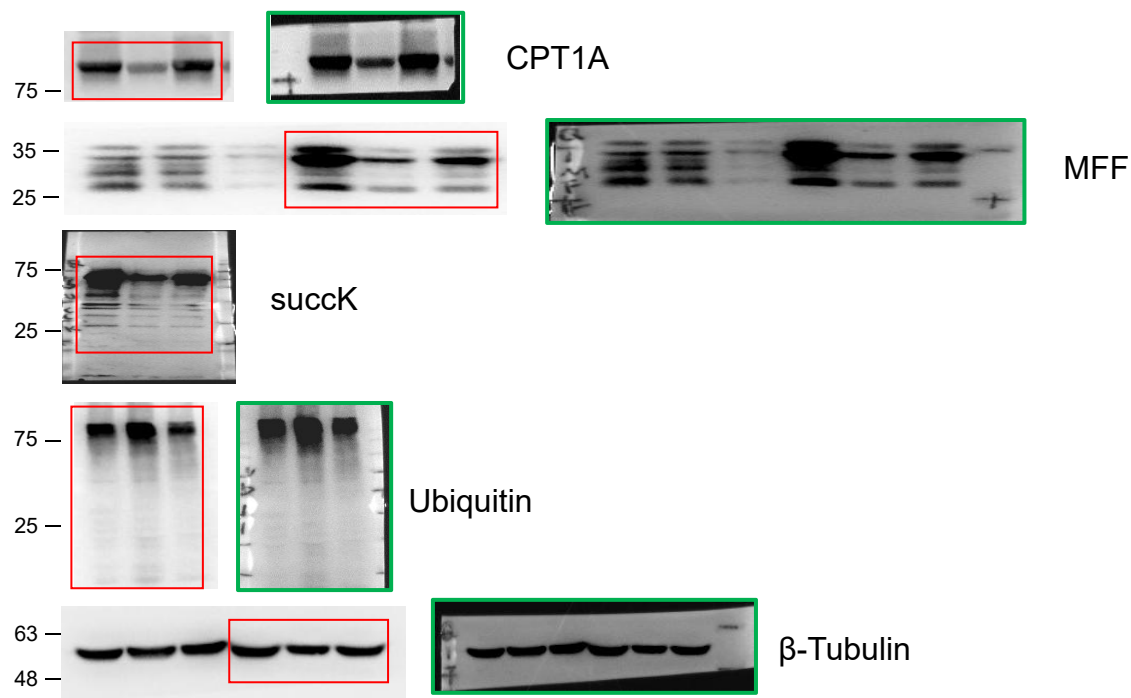

**Fig. 5d**

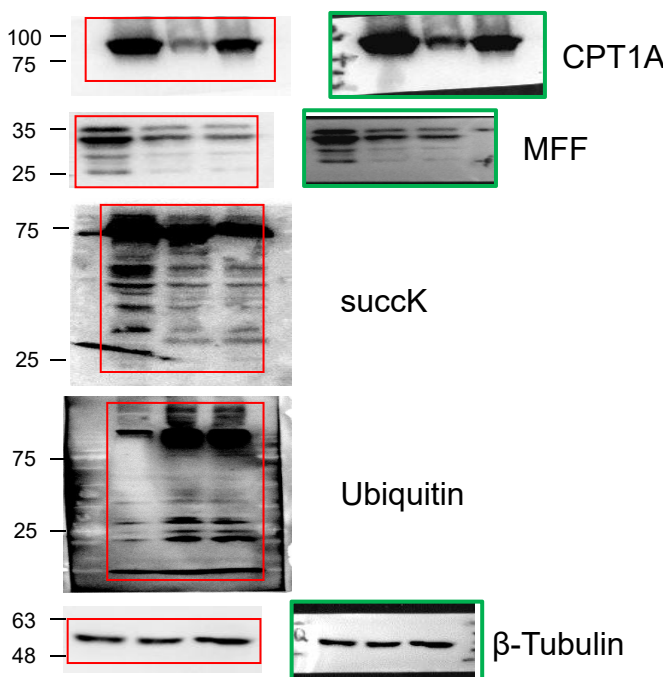

Fig. 5g

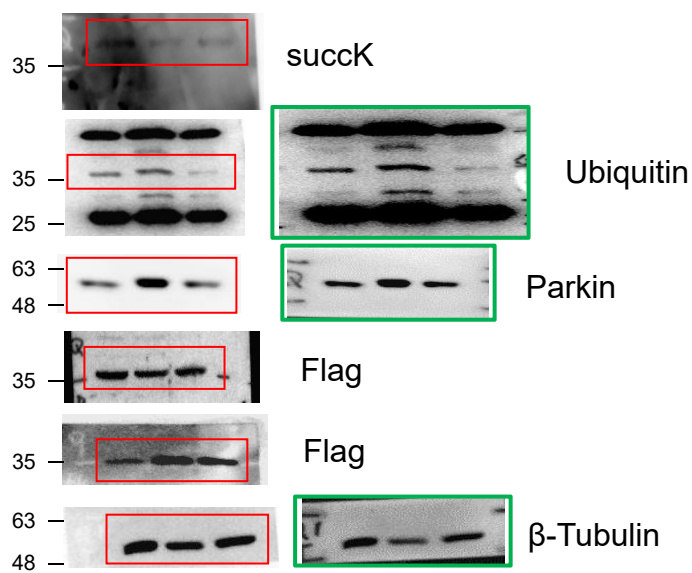

Fig. 5h

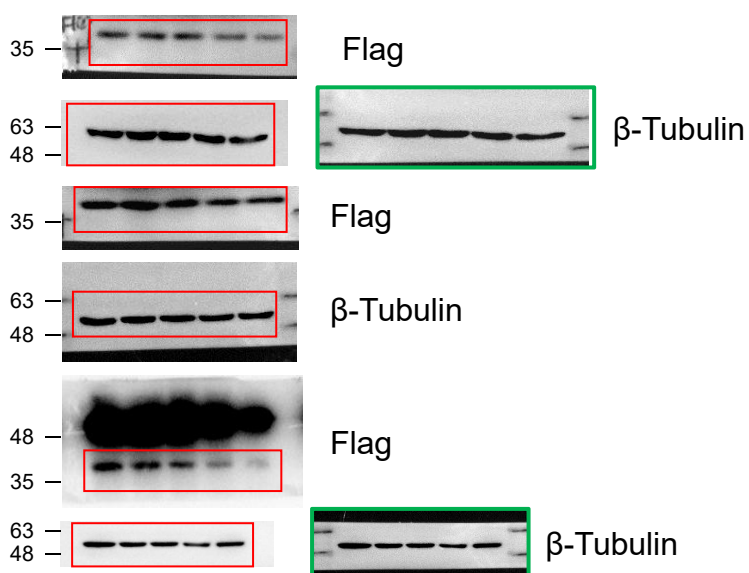

Fig. 6a

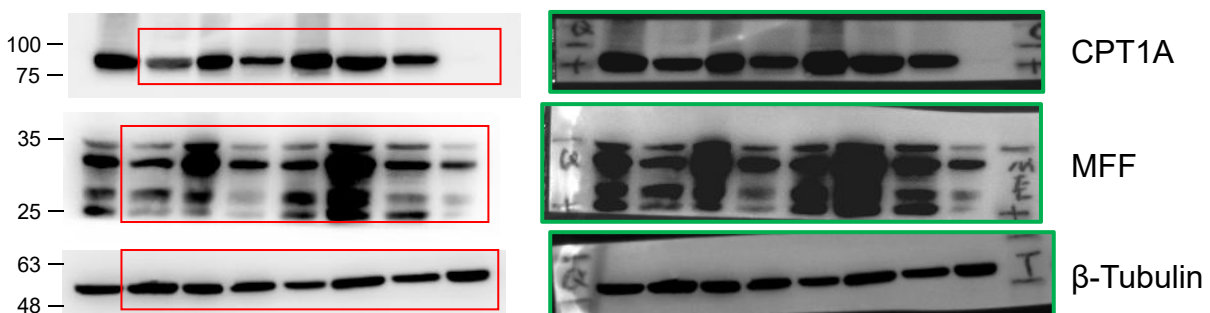

**Fig. S1a**

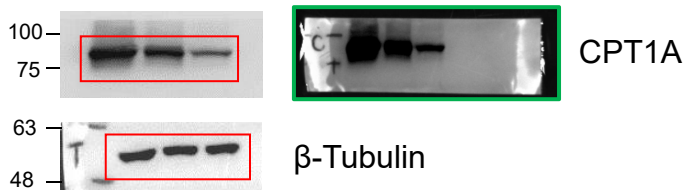

**Fig. S1h**

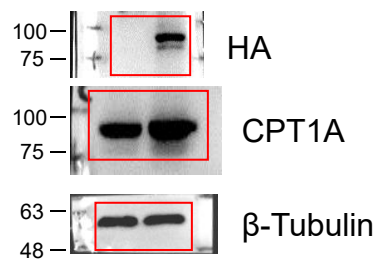

**Fig. S1j**

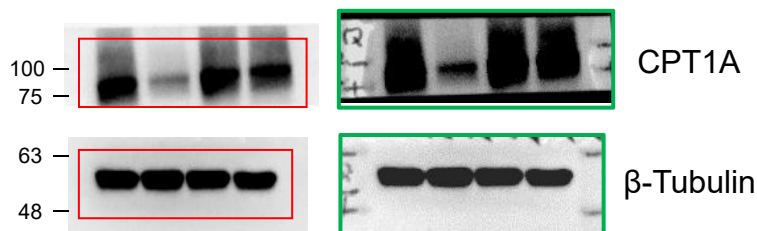

**Fig. S1k**

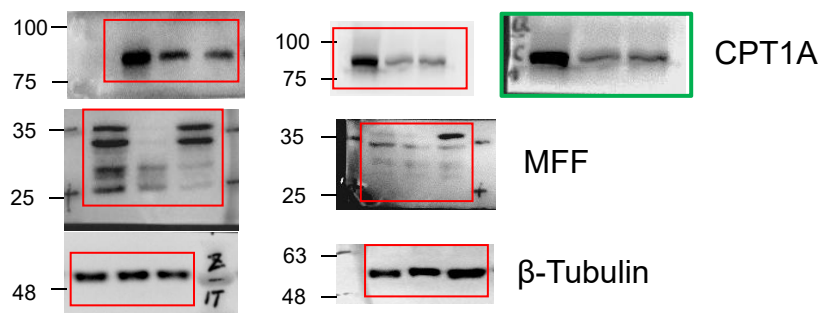

**Fig. S1l**

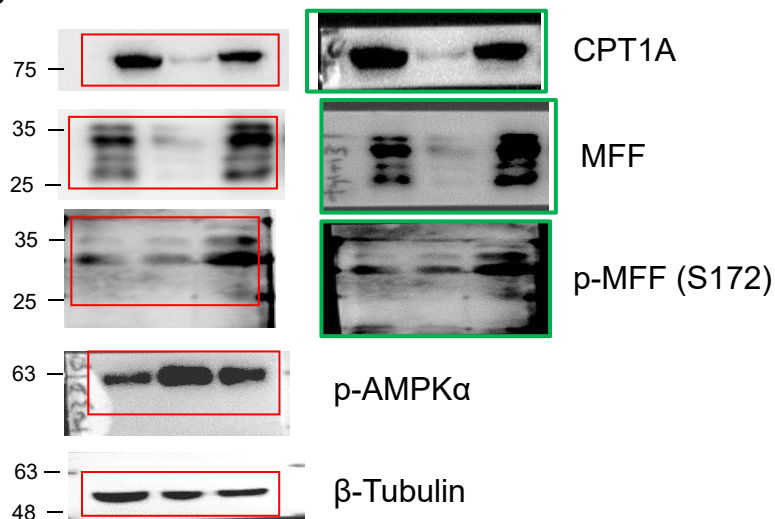

**Fig. S2b**

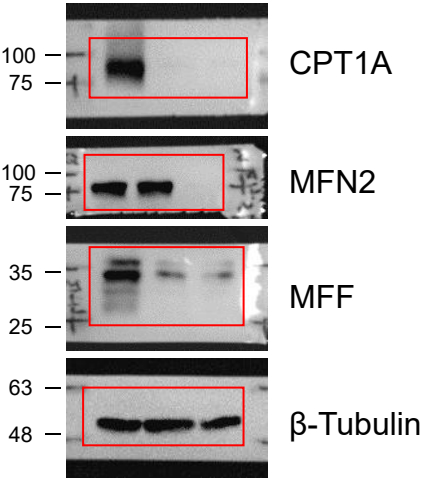

**Fig. S2e**

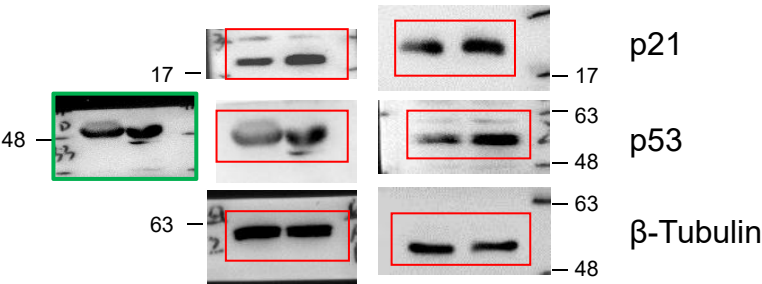

**Fig. S2f**

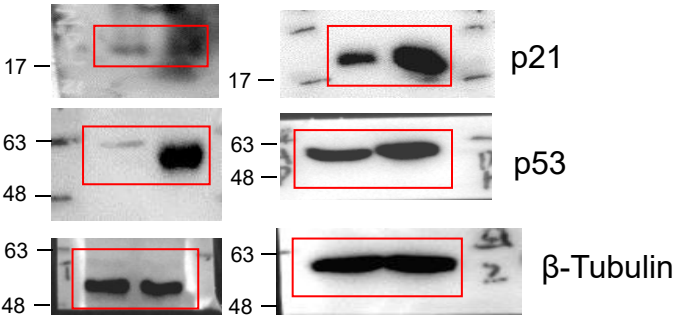

**Fig. S2h**

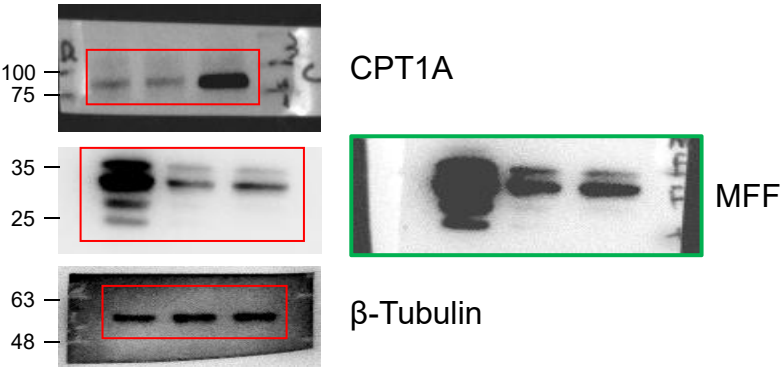

Fig. S3a

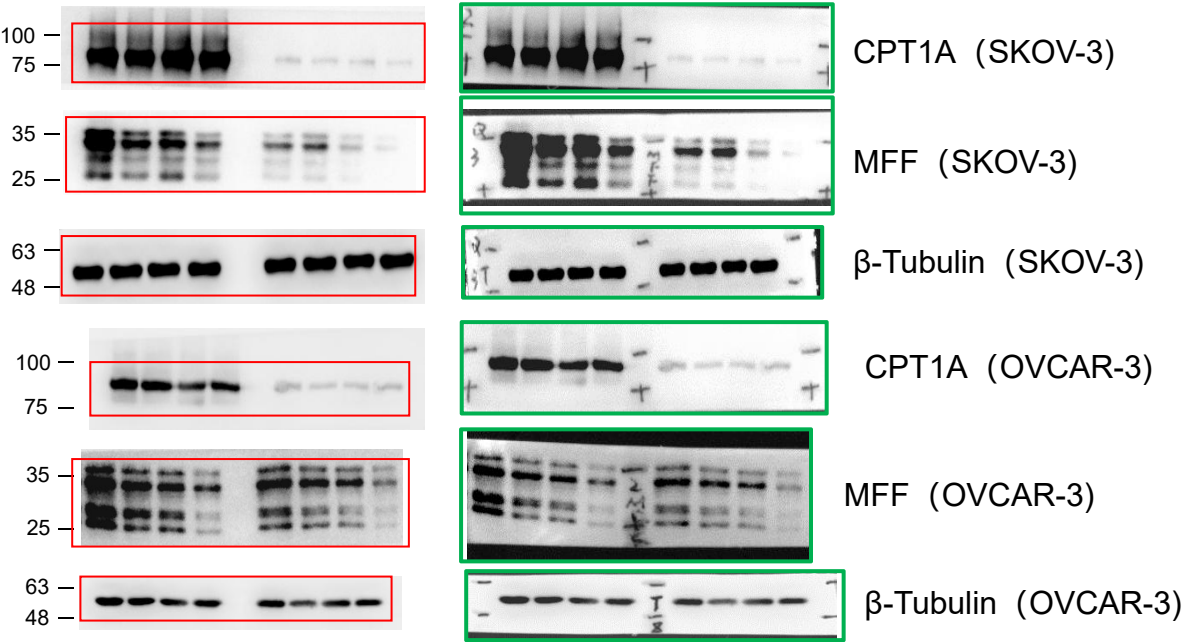

Fig. S3b

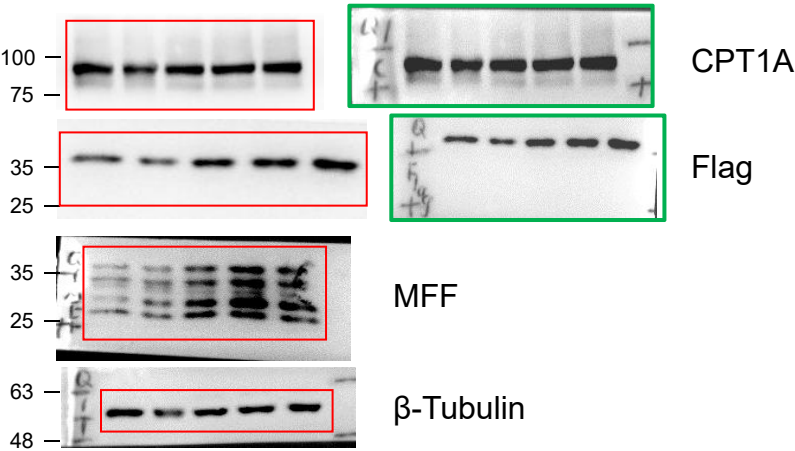

Fig. S3c

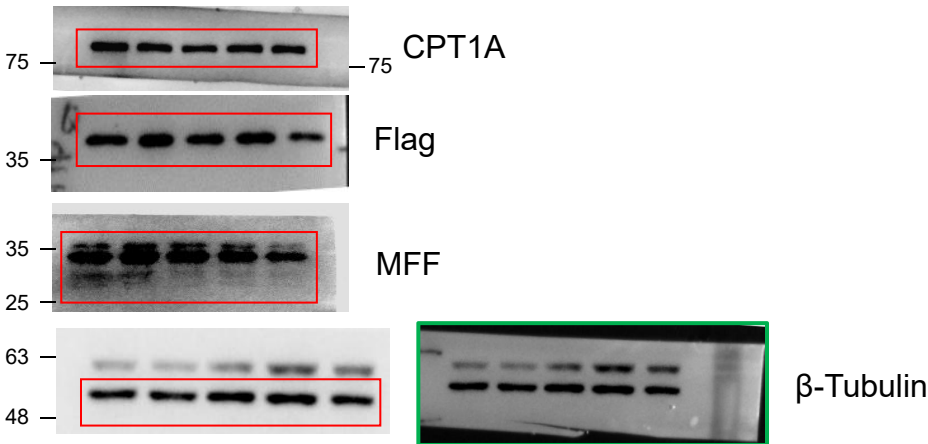

Fig. S3d

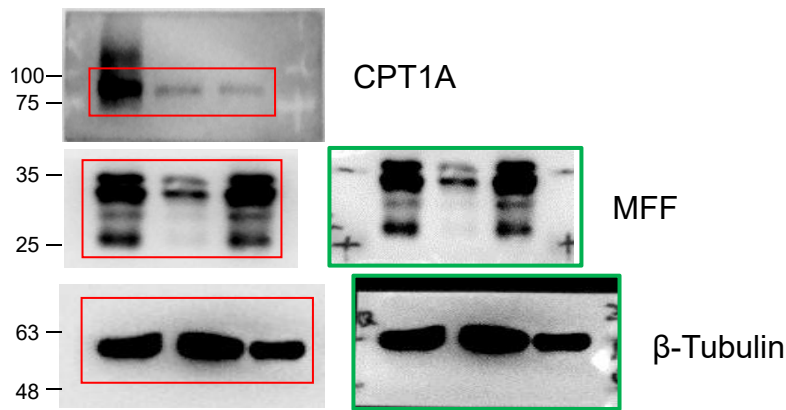

Fig. S5a

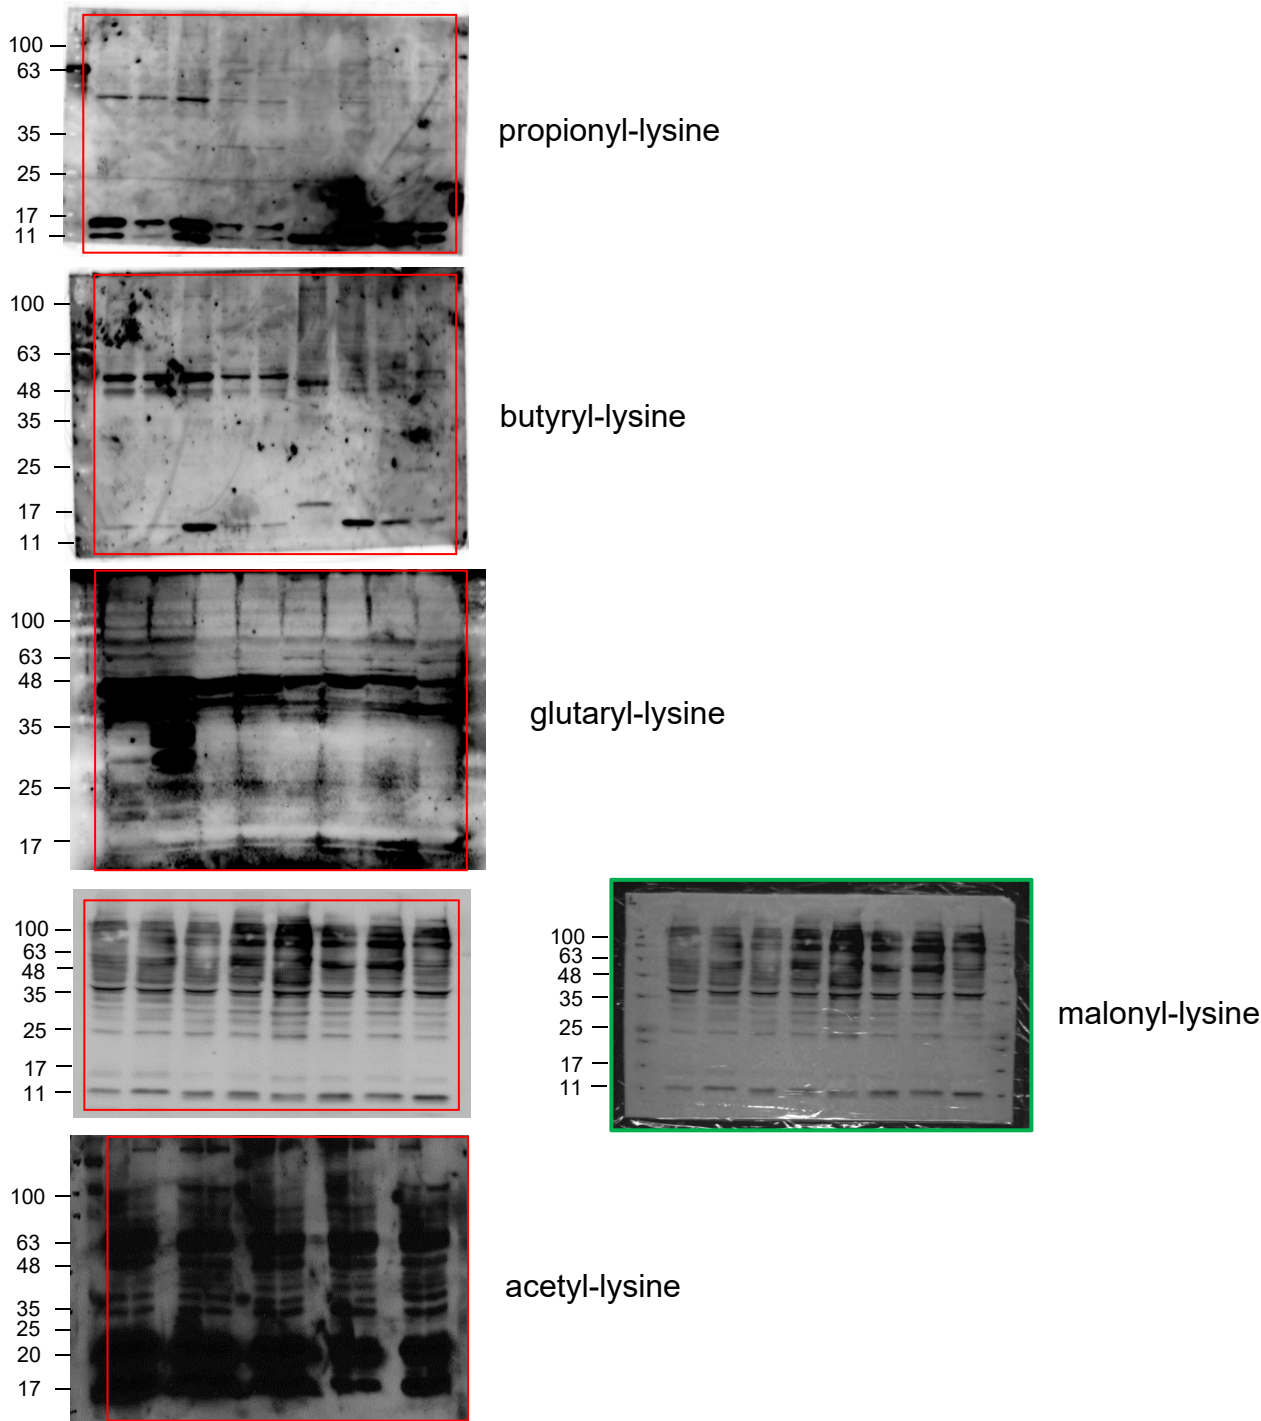



**Fig. S5b**

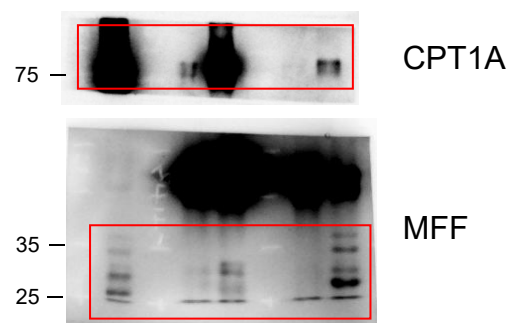

**Fig. S5d**

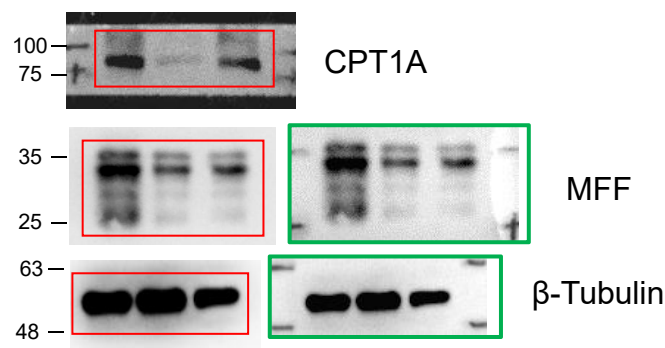

**Supplementary Fig. 6. Uncropped/unedited images of blots.**

Uncropped images of blots in the Figures and Supplementary Figures. The blots boxed in green are the corresponding ones with molecular weight ladders with different exposure time.



**Supplementary Table 1: Antibody information**

| Antibodies used in this study |         |             |            |                      |          |
|-------------------------------|---------|-------------|------------|----------------------|----------|
| Antibody                      | Species | Source      | Cat no     | Used in              | Dilution |
| CPT1A                         | mouse   | Abcam       | 128568     | Western Blot         | 1:1000   |
|                               |         |             |            | Immunohistochemistry | 1:200    |
| Drp1                          | rabbit  | CST         | 5391       | Western Blot         | 1:1000   |
|                               |         |             |            | Immunofluorescence   | 1:200    |
| Flag                          | mouse   | Sigma       | F1804      | Western Blot         | 1:1000   |
| Fis1                          | rabbit  | Proteintech | 10956-1-AP | Western Blot         | 1:1000   |
| HA                            | rabbit  | CST         | 3724       | Western Blot         | 1:1000   |
| Ki-67                         | mouse   | Servicebio  | 111141     | Immunohistochemistry | 1:500    |
| MFF                           | rabbit  | CST         | 84580      | Western Blot         | 1:1000   |
| MFF                           | rabbit  | Proteintech | 17090-1-AP | Immunohistochemistry | 1:800    |
| MFN2                          | rabbit  | CST         | 9482       | Western Blot         | 1:1000   |
| Parkin                        | rabbit  | CST         | 2132       | Western Blot         | 1:1000   |
| Succinyllysine                | rabbit  | PTM BIO     | PTM-401    | Western Blot         | 1:1000   |
| $\beta$ -Tubulin              | rabbit  | Proteintech | 11224-1-AP | Western Blot         | 1:4000   |
| Ubiquitin                     | mouse   | CST         | 3933       | Western Blot         | 1:1000   |
| p21                           | rabbit  | CST         | 2947       | Western Blot         | 1:1000   |
|                               |         |             |            | Immunohistochemistry | 1: 50    |
| p53                           | mouse   | Proteintech | 60283-2-Ig | Western Blot         | 1:1000   |
| Propionyl-Lysine              | rabbit  | PTM BIO     | PTM-201    | Western Blot         | 1:1000   |
| Malonyl-Lysine                | rabbit  | PTM BIO     | PTM-901    | Western Blot         | 1:1000   |
| Acetylated-Lysine             | rabbit  | CST         | 9441S      | Western Blot         | 1:1000   |
| Glutaryl-Lysine               | rabbit  | PTM BIO     | PTM-1151   | Western Blot         | 1:1000   |
| Butyryl-Lysine                | rabbit  | PTM BIO     | PTM-301    | Western Blot         | 1:1000   |
